# Supplementary material
Source: Springer Nature journal article supplement (https://www.springermedizin.de/resource/supplementary/12935_2013_434_MOESM5_ESM.pdf/9540628)

↑ miR-205

↑ miR-10a

CYR61  
CTGF

CHL1

MST2  
CDC42  
RhoA

Bax

↑ miR-133b

↑ miR-886-5p

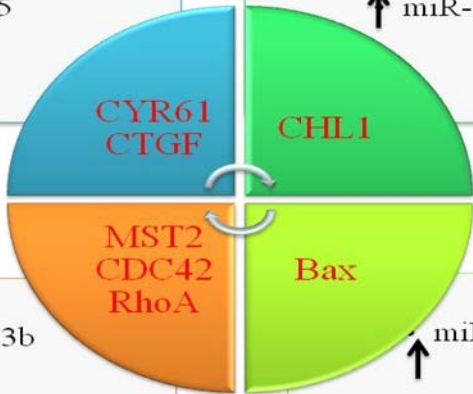

Supplement: MOESM5 [file 9540628]
